# Supplementary material
Source: Springer Nature journal article supplement (https://www.springermedizin.de/resource/supplementary/13584_2011_25_MOESM1_ESM.pdf/9676820)

Legislation - Health policy - Culture & Norms

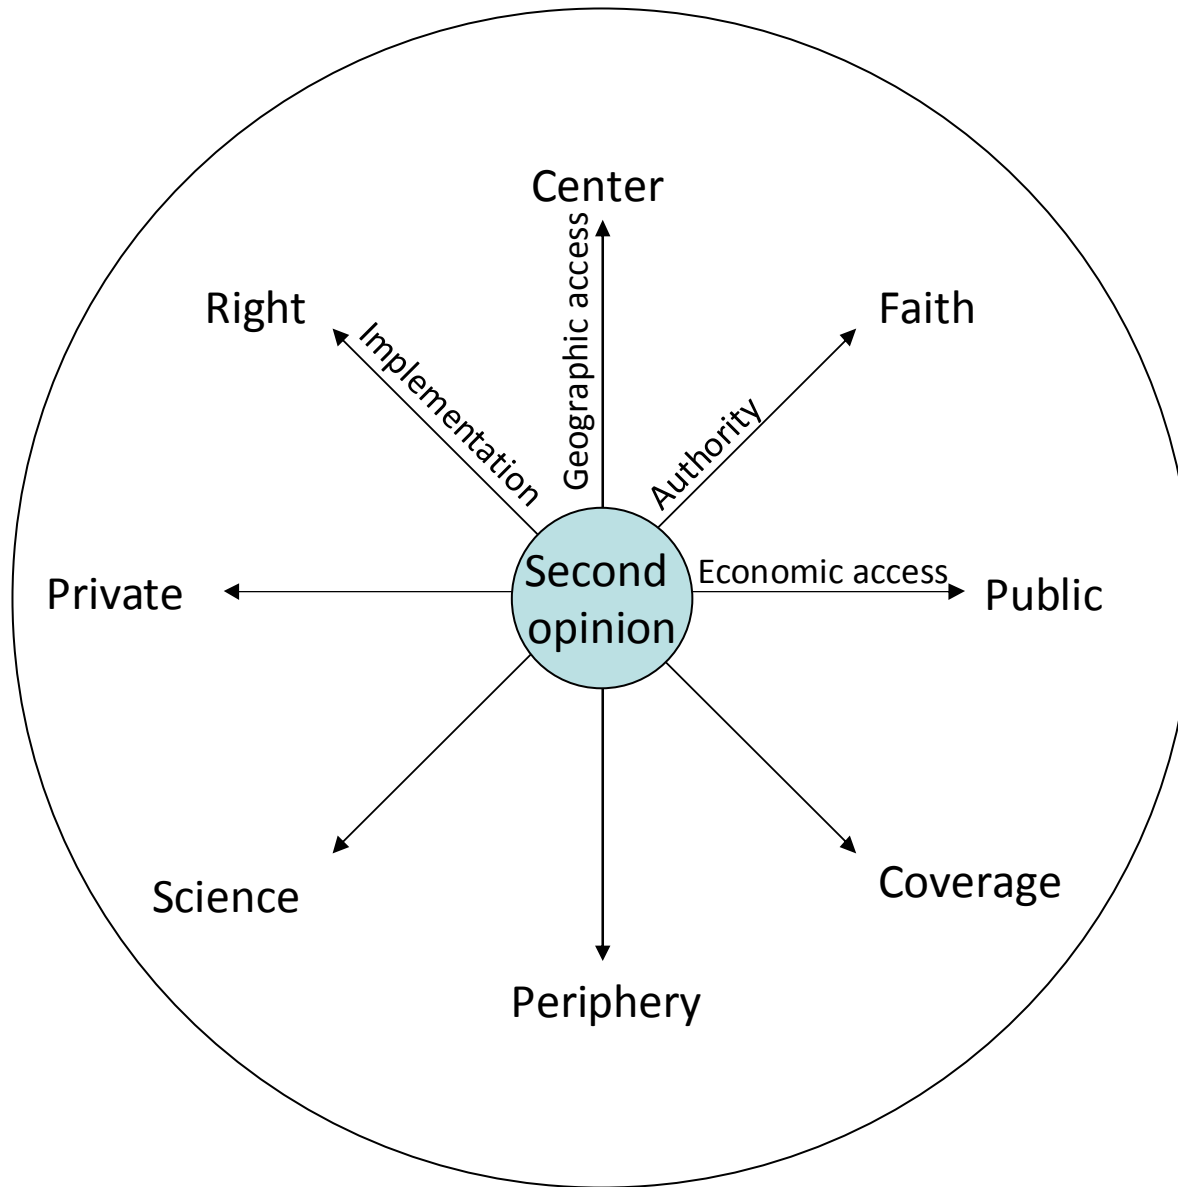

Supplement: MOESM1 [file 9676820]
